# Supplementary material
Source: publisher figshare collection journal article supplement (https://aacr.figshare.com/articles/dataset/_/22466430)
Supplement: Supplementary file 1 [file 39917814]

**Table S1.** Summary of mutations used as clinical factors in this study

|                                    | Mutations     |       |                               |
|------------------------------------|---------------|-------|-------------------------------|
|                                    | KRAS          | BRAF  | PIK3CA                        |
| PETACC3                            | G12, G13      | V600E | Microarray                    |
| TCGA                               | G12, G13      | V600E | R88, E542, E545, H1047        |
| Agendia (GSE42284)                 | G12, G13, Q61 | V600E | E542, E545, Q546, D549, H1047 |
| Agendia (ICO)                      | G12, G13, Q61 | V600E | E542, E545, Q546, D549, H1047 |
| Agendia (VHB)                      | G12, G13, Q61 | V600E | E542, E545, Q546, D549, H1047 |
| Marisa <i>et al.</i> (GSE39582)    | G12, G13      | V600E | No info                       |
| Schlicker <i>et al.</i> (GSE35896) | NA            | NA    | NA                            |
| GSE75315                           | G12, G13, Q61 | V600E | E542, E545, Q546, H1047       |
| GSE75316                           | G12, G13, Q61 | V600E | E542, E545, Q546, H1047       |

**NA:** Data not available

**No info:** No information available concerning mutation origin

### Legend

This table shows which amino acid change were considered as mutations for the KRAS, BRAF and PIK3CA genes according to the cohort.

**Table S2.** Non-zero coefficients genes obtained by training a penalized generalized linear model to classify BM subtypes

| <b>Positive Genes</b> | <b>Coefficient</b> | <b>Negative Genes</b> | <b>Coefficient</b> |
|-----------------------|--------------------|-----------------------|--------------------|
| BASP1                 | 0.342485896        | ARSE                  | -0.01401327        |
| CMTM3                 | 0.031282542        | CASP6                 | -0.09803343        |
| DPT                   | 0.005840771        | CDCA7                 | -0.090138226       |
| EGR2                  | 0.133714218        | CLDN7                 | -0.232541451       |
| F13A1                 | 0.188165758        | ETFA                  | -0.180873579       |
| FBXL7                 | 0.144898935        | FAHD1                 | -0.116693331       |
| GAS7                  | 0.042158651        | IL17RE                | -0.094899931       |
| GGT5                  | 0.031779867        | KIF11                 | -0.116408835       |
| GPX7                  | 0.229157793        | LTA4H                 | -0.187723635       |
| HEYL                  | 0.071816609        | METAP1                | -0.047317976       |
| ID4                   | 0.118511862        | MGST1                 | -0.005672195       |
| KLHDC7B               | 0.052945152        | PIK3R4                | -0.11800317        |
| LRRC33                | 0.230244064        | POLR3B                | -0.058432825       |
| LTBP2                 | 0.092759565        | RAD51                 | -0.476755217       |
| MAN1C1                | 0.000244544        | SYAP1                 | -0.274105589       |
| NGFR                  | 0.195062095        | TOM1L1                | -0.236090048       |
| PIK3CD                | 0.089712298        | TPD52                 | -0.283762662       |
| PPP1R16B              | 0.121076115        | YARS2                 | -0.016994029       |
| PRICKLE1              | 0.478722755        | ZWINT                 | -0.059964679       |
| PTGIS                 | 0.17287554         |                       |                    |
| RGL1                  | 0.330410084        |                       |                    |
| RUNX1T1               | 0.127930532        |                       |                    |
| SLFN11                | 0.091951297        |                       |                    |
| TM6SF1                | 0.08743986         |                       |                    |
| TSHZ3                 | 0.22659478         |                       |                    |

**Legend**

Table displaying the genes with non-zero coefficients after having trained a generalized logistic (binomial method) model via lasso penalty on the BRAF mutant dataset and using the BM1 and BM2 calls as response variables. These genes can be used to classify any sample with a gene expression profile into BM1 or BM2.
